# Supplementary material for: Rhodium-catalyzed tandem cyclization–cycloaddition reactions of enynebenzaldehydes: construction of polycyclic ring systems
Source: Royal Society of Chemistry journal article supplement (doi:10.1039/b506003f), 2005-01-01
Supplement: b506003f.pdf [file b506003f.pdf]

## Supporting Information

### Rhodium Catalyzed Cyclization-cycloaddition Reactions of Enynebenzaldehydes: Construction of Polycyclic Ring System

Seunghoon Shin, Arun Kumar Gupta, Chul Yun Rhim and Chang Ho Oh\*  
Department of Chemistry, Hanyang University, Seoul 133-791, South Korea.  
e.mail: [changho@hanyang.ac.kr](mailto:changho@hanyang.ac.kr)

#### A General Procedure:

All solvents were reagent grade. All chemicals were purchased from Aldrich Chemical Co. Reactions were normally carried out under argon atmosphere in flame-dried glassware. Merck silica gel 60 (partial size 0.04-0.063 mm) was employed for flash chromatography. The sample was analyzed and/or separated on a  $\mu$ -Porasil column (25 cm x 1.0 cm) by elution with gradient of ethyl acetate and hexane. The flow rate of the indicated elution solvent is maintained at 5 mL/min, and the retention time of a compound is recorded.  $^1\text{H}$  NMR and COSY spectra were obtained in  $\text{CDCl}_3$  unless otherwise noted at 400 MHz.  $^{13}\text{C}$  NMR spectra, HMBC, HMQC and DEPT experiments were obtained at 100 MHz.

#### General Experimental Procedure for the preparation of compound 11a-i:

Into a 10 mL round bottomed flask, 1 mmol of enynebenzaldehyde, 5 mole%  $[\text{Rh}(\text{COD})\text{Cl}]_2$  dimer and 10 mole% DPPP, was taken. To this 5% aqueous toluene (2 mL) was added through the glass syringe. Reaction mixture first, stirred for 10 min at room temperature and then kept in preheated oil bath at 100-110 °C. After completion of the reaction, it was cooled, diluted with diethylether and filtered through celite. The solvent was evaporated and subjected for column chromatography to get pure compound.

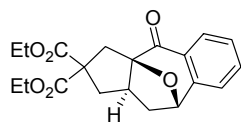

**Spectroscopic data of compound 2a:** (Colorless syrupy liquid,  $R_f = 0.55$ , 25% EtOAc-hexane). **IR (neat):** 2980, 1728, 1699, 1602, 1445, 1366, 1268, 1247, 1182, 1093, 862  $\text{cm}^{-1}$ ;  **$^1\text{H}$  NMR ( $\text{CDCl}_3$ ):**  $\delta$  8.00 (d,  $J=7.6$  Hz, 1 H), 7.50 (t,  $J=8.1$  Hz, 1 H), 7.36 (t,  $J=7.20$  Hz, 1 H), 7.17 (d,  $J=7.2$  Hz, 1 H), 5.31 (d,  $J=6.4$  Hz, 1 H), 4.17 (m, 4 H), 3.28 (d,  $J=14.8$  Hz, 1 H), 2.66-2.78 (m, 2 H), 2.44 (dd,  $J=14.4, 4.4$  Hz, 1 H), 2.39 (m, 2 H), 2.15 (dt,  $J=9.2, 6.4, 2.8$  Hz, 1 H), 1.21 (t,  $J=7.2$  Hz)  **$^{13}\text{C}$  NMR ( $\text{CDCl}_3$ ):**  $\delta$  193.77, 171.07, 171.03, 146.97, 133.98, 128.49, 128.06, 127.30, 124.04, 97.22, 80.18, 62.42, 62.10, 61.91, 44.18, 39.95, 37.81, 14.49, 14.44; **MS (m/z) HRMS:** exact mass calculated for:  $\text{C}_{20}\text{H}_{22}\text{O}_6$  ( $\text{M}^+$ ): 358.1416; **found.** 358.1421.

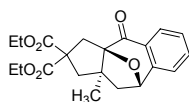

**Spectroscopic data of compound 2b:** (Colorless syrupy liquid,  $R_f = 0.55$ , 25% EtOAc-hexane). **IR (neat):** 2979, 1727, 1697, 1599, 1451, 1345, 1162, 1093, 1011, 911  $\text{cm}^{-1}$ ;  **$^1\text{H}$  NMR ( $\text{CDCl}_3$ ):**  $\delta$  8.01 (d,  $J=7.6$  Hz, 1 H), 7.51 (t,  $J=7.6$  Hz, 1 H), 7.15 (d,  $J=7.60$  Hz, 1 H), 5.19 (d,  $J=6.80$  Hz, 1 H), 4.16-4.25 (m, 4 H), 3.19 (d,  $J=14.80$  Hz, 1 H), 3.02 (d,  $J=13.6$  Hz, 1 H), 2.81 (dd,  $J=7.6, 6.8$  Hz, 1 H), 2.71 (d,  $J=14.6$  Hz, 1 H), 1.91 (d,  $J=14.6$  Hz, 1 H), 1.81 (d,  $J=12.0$  Hz, 1 H), 1.26 (t,  $J=7.2$  Hz, 3 H), 0.92 (s, 3 H).  **$^{13}\text{C}$  NMR ( $\text{CDCl}_3$ ):**  $\delta$  193.97, 171.28, 171.09, 146.74, 133.89, 129.08, 127.94, 126.66, 123.91, 98.59, 79.02, 61.77, 61.50, 59.56, 50.08, 49.03, 47.18, 36.96, 29.67, 26.34, 14.00, 13.98; **MS (m/z) HRMS:** exact mass calculated for:  $\text{C}_{21}\text{H}_{24}\text{O}_6$  ( $\text{M}^+$ ): 372.1573; **found.** 372.1561.

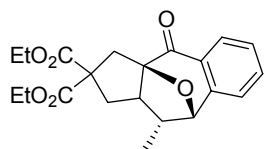

**Spectroscopic data of compound 2c:** (Colorless syrupy liquid,  $R_f$  = 0.51, 25 % EtOAc-hexane). **IR (neat):** 2978, 1729, 1700, 1603, 1459, 1366, 1247, 1183, 1110, 1016, 913  $\text{cm}^{-1}$ ;  **$^1\text{H NMR (CDCl}_3\text{):}$**   $\delta$  8.05 (d,  $J$  = 7.6 Hz, 1 H), 7.52 (t,  $J$  = 7.2 Hz, 1 H), 7.42 (t,  $J$  = 7.6 Hz, 1H), 7.11 (d,  $J$  = 7.6 Hz, 1 H), 5.07 (d,  $J$  = 6.4 Hz, 1 H), 4.17-4.27 (m, 4 H), 3.20 (d,  $J$  = 12.8 Hz, 1 H), 2.63-2.78 (m, 1 H), 2.59-2.60 (t,  $J$  = 2.4 Hz, 2 H), 2.33 (dd,  $J$  = 10.0, 4.8 Hz, 1 H), 2.13-2.15 (m, 1 H), 1.27 (t,  $J$  = 7.2 Hz, 6 H), 0.76 (d,  $J$  = 6.8 Hz, 3 H).  **$^{13}\text{C NMR (CDCl}_3\text{):}$**   $\delta$  193.94, 171.06, 143.45, 133.28, 129.19, 128.22, 127.37, 125.98, 97.34, 83.85, 62.35, 62.11, 61.91, 52.37, 45.15, 38.50, 37.85, 16.29, 12.48, 14.43. **MS (m/z) HRMS: exact mass calculated for:**  $\text{C}_{21}\text{H}_{24}\text{O}_6$  ( $M^+$ ): 372.1573; **found.** 372.1563.

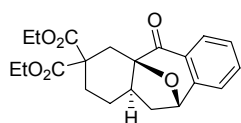

**Spectroscopic data of compound 2d:** (Colorless syrupy liquid,  $R_f$  = 0.55, 25 % EtOAc-hexane). **IR (neat):** 2980, 2850, 1730, 1689, 1610, 1462, 1379, 1246, 1247, 1174 1108, 908  $\text{cm}^{-1}$ ;  **$^1\text{H NMR (CDCl}_3\text{):}$**   $\delta$  8.09 (d,  $J$  = 8.6 Hz, 1 H), 7.50 (t,  $J$  = 8.1 Hz, 1 H), 7.23 (t,  $J$  = 8.5, 1 H), 7.15 (d,  $J$  = 8.2 Hz, 1 H), 5.31 (d,  $J$  = 7.2 Hz, 1 H), 4.19-4.22 (m, 4 H), 3.33 (d,  $J$  = 14.3 Hz, 1H), 2.96-2.98 (m, 2 H), 2.34 (dd,  $J$  = 4.4, 4.4 Hz, 1H), 2.23, (m, 2 H), 2.23 (m, 2 H), 2.14 (dt,  $J$  = 10.2, 7.2, 2.8 Hz, 1 H), 1.21 (t,  $J$  = 7.2 Hz, 6 H)  **$^{13}\text{C NMR (CDCl}_3\text{):}$**   $\delta$  193.87, 176.37, 170.10, 140.69, 134.7, 132.75, 128.49, 128.26, 97.22, 80.18, 61.01 59.42, 59.10, 44.18, 38.29, 37.81, 26.23, 23.8, 14.50, 14.24; **MS (m/z) HRMS: exact mass calculated for:**  $\text{C}_{21}\text{H}_{24}\text{O}_6$  ( $M^+$ ): 372.1573; **found.** 372.1481.

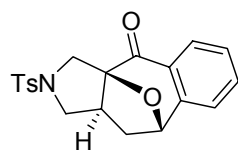

**Spectroscopic data of compound 2e:** (Colorless syrupy liquid,  $R_f$  = 0.55, 50 % EtOAc-hexane). **IR (neat):** 2946, 2866, 1697, 1597, 1344, 1162, 1093, 1003, 912, 783  $\text{cm}^{-1}$ ;  **$^1\text{H NMR (CDCl}_3\text{):}$**   $\delta$  7.97 (d,  $J$  = 7.6 Hz, 1 H), 7.74 (d,  $J$  = 8.4 Hz, 2 H), 7.51 (t,  $J$  = 6.4 Hz, 1 H), 7.39-7.41 (m 3 H), 7.18 (d,  $J$  = 6.8 Hz, 1 H), 5.39 (d,  $J$  = 6.4 Hz, 1 H), 3.99 (d,  $J$  = 11.20 Hz, 1 H), 3.45-3.55 (m, 2 H), 3.23-3.26 (m, 1 H), 2.59-2.64 (m, 1 H), 2.44 (s, 3 H), 2.12-2.23 (m, 2 H).  **$^{13}\text{C NMR (CDCl}_3\text{):}$**   $\delta$  191.42, 146.08, 143.74, 134.12, 129.64, 128.12, 127.97, 127.88, 127.21, 123.86, 95.30, 80.36, 53.92, 51.39, 44.11, 38.14, 21.71; **MS (m/z) HRMS: exact mass calculated for:**  $\text{C}_{20}\text{H}_{19}\text{NO}_4\text{S}$  ( $M^+$ ): 369.1035; **found.** 369.1029.

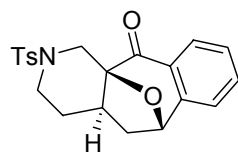

**Spectroscopic data of compound 2f:** (Colorless syrupy liquid,  $R_f$  = 0.55, 50 % EtOAc-hexane). **IR (neat):** 2925, 1691, 1642, 1598, 1460, 1344, 1284, 1159, 1091, 793  $\text{cm}^{-1}$ ;  **$^1\text{H NMR (CDCl}_3\text{):}$**   $\delta$  7.94 (d,  $J$  = 8.2 Hz, 1 H), 7.69 (d,  $J$  = 8.0 Hz, 2 H), 7.52 (t,  $J$  = 7.6 Hz, 1 H), 7.31 (t,  $J$  = 7.2 Hz, 1 H), 7.31 (d,  $J$  = 8.0 Hz, 2 H), 7.19 (d,  $J$  = 8.00 Hz, 2 H), 5.25 (d,  $J$  = 6.80 Hz, 1 H), 4.10 (q,  $J$  = 7.20, 6.80 Hz 1 H), 3.96 (d,  $J$  = 13.2 Hz, 1 H), 3.66-3.68 (m, 1 H), 3.56 (d,  $J$  = 12.9 Hz, 1H), 2.65-2.68 (m, 1 H), 2.44 (s, 3 H), 1.98-2.07 (m, 5 H), 2.00 (m, 1 H).  **$^{13}\text{C NMR (CDCl}_3\text{):}$**   $\delta$  194.97, 148.13, 143.25, 134.08, 133.85, 129.64, 129.47, 127.82, 127.82, 127.53, 127.47, 122.99, 85.56, 75.98, 45.05, 43.03, 40.08, 34.42, 29.15, 21.66, 14.32; **MS (m/z) HRMS: exact mass calculated for:**  $\text{C}_{21}\text{H}_{21}\text{NO}_4\text{S}$  ( $M^+$ ): 383.1153; **found.** 383.1220.
